# Supplementary material
Source: PubMed Central journal article supplement (PMC7165059)
Supplement: NIHMS1551445-supplement-1.pdf [file NIHMS1551445-supplement-1.pdf]

## Supplementary

### Section 1: MRI sequence parameters for the CCF cohort of the test set

The MR images were acquired in a routine clinical workflow on 1.5 Tesla scanners using Siemens (Trio, SYNGO MR A30 4VA30A software, Munich, Germany), with a 12 channel head matrix coil. Post contrast T1w sequences (Gd-T1w) were acquired using a weight adjusted doses of 0.1mmol/kg gadolinium based contrast agent (GBCA; Gadobutrol, Gadavist®, Bayer Healthcare Pharmaceuticals, New Jersey, USA) that was administered intravenously.

T2w-FLAIR sequences were acquired prior to contrast administration. This ensured that the hyperintense regions from the enhancing region of the tumor habitat did not manifest on T2w-FLAIR MR images. T2w images were acquired immediately after gadolinium (Gd) intravenous administration. This optimized the total scanning time and allowed for contrast circulation during T2w image acquisition. Lastly, routine scans with contrast Gd-T1w sequences are obtained immediately following T2w sequence.

Sequence parameters for pre- and post- contrast T1w, T2w and T2w-FLAIR are as follows:

- T1w and GdT1w images (3D axial) – Flip Angle = 90°, repetition time (TR) = 550 - 1000 ms and echo time (TE) = 3-12ms
- T2w images (2D axial) – Flip Angle = 90°, slice thickness = 5mm, repetition time (TR) = 3000-5550 ms and echo time (TE) = 85 – 105 ms
- T2w-FLAIR images (2D axial) – Slice thickness = 5mm, repetition time (TR) = 8000 – 10000 ms and echo time (TE) = 90 - 150 ms

### Section 2 : List of features extracted

| Features            | Description                                                                                                            |
|---------------------|------------------------------------------------------------------------------------------------------------------------|
| Size                | Including Width, Height, Depth of bounding box (3 features)                                                            |
| Area                | from 2D slices of each nodule, calculate number of pixels in a given ROI                                               |
| Perimeter           | from 2D slices of each nodule                                                                                          |
| Eccentricity        | foci of the ellipse and to major axis length (eg, a circle has 0 eccentricity; an ellipse has a value between 0 and 1) |
| Extent              | ratio of pixels in the region to pixels in the total bounding box                                                      |
| Compactness         | ratio of the perimeter squared to the product of $4\pi$ and area                                                       |
| Radial distance     | distances from center of each slice to contour points                                                                  |
| Roughness           | perimeter of slices divided by convex perimeter                                                                        |
| Elongation          | from major and minor axis                                                                                              |
| Convexity           | from convex hull                                                                                                       |
| Equivalent Diameter | Diameter of circle with same area of slices                                                                            |
| Sphericity          | 3D compactness                                                                                                         |

*Table S1: List of shape features extracted*

| Feature category | Descriptor                                           | Intuitive description                    | Relevance to GBM pathophysiology                                                                   |
|------------------|------------------------------------------------------|------------------------------------------|----------------------------------------------------------------------------------------------------|
| Laws features    | E5, L5, S5, R5 (combination in X,Y and Z directions) | E- Edges, L- Level, S- Spots, R- Ripples | Accounting for characteristic qualitative appearance of wave, ripple, edge and spots within an ROI |

*Radiogenomic-based survival risk stratification of tumor habitat on Gd-T1w MRI is associated with biological processes in Glioblastoma*

|                   |                                 |                                                                                                                                                                                                                                                      |                                                                                                                                          |
|-------------------|---------------------------------|------------------------------------------------------------------------------------------------------------------------------------------------------------------------------------------------------------------------------------------------------|------------------------------------------------------------------------------------------------------------------------------------------|
| Gabor features    |                                 | This filter bank has characteristics of spatial locality and orientation selectivity                                                                                                                                                                 | Captures the prominent direction in which the intensity changes occur                                                                    |
| Haralick features | Inverse difference moment (IDM) | IDM is a reflection of the presence or absence of uniformity, and hence is a measure of local regions of homogeneity High IDM: Higher presence of locally uniform windows in GLCM. Low IDM: Higher presence of locally heterogeneous windows in GLCM | Captures the underlying lesion heterogeneity                                                                                             |
|                   | Correlation                     | Quantifies the linear patterns in an image based on the distance parameter.                                                                                                                                                                          | Increased presence of linear patterns yield higher correlation values, lack of image linearity yield lower correlation values            |
|                   | Sum Entropy                     | Measure of GLCM relationship to distribution of intensity with respect to entropy (measure of disorder)                                                                                                                                              | Higher entropy is indicative of more chaotic arrangement in areas of high viable cell population                                         |
|                   | Sum Variance                    | Measure of GLCM relationship to distribution of intensity with respect to variance. High sum variance: greater standard deviation of sum average. Low sum variance: low standard deviation of sum average                                            | Possibly accounting for greater variation of scattered atypia and local accumulation of mitotic processes as observed on histopathology. |

**Table S2:** Pathophysiological significance of radiomic features which possibly reflect biological traits of GBM and can be captured on MRI

| Feature Category | Implementation details                                                                                                                                                                                                                                                                                                                                                                                                                                                                                                                                                                                                                                                                                                         |
|------------------|--------------------------------------------------------------------------------------------------------------------------------------------------------------------------------------------------------------------------------------------------------------------------------------------------------------------------------------------------------------------------------------------------------------------------------------------------------------------------------------------------------------------------------------------------------------------------------------------------------------------------------------------------------------------------------------------------------------------------------|
| Laws Energy      | <p>1) window size of kernels - 5</p> <p>2) the 'same' option in MATLAB <b>conv command</b> was used to trim the outer part of the convolution and return only the central part, which was the same size as the input.</p> <p>3) 1D Kernels used:</p> <p style="margin-left: 40px;">L (Level) = [ 1 4 6 4 1 ]</p> <p style="margin-left: 40px;">E (Edge) = [-1 -2 0 2 1]</p> <p style="margin-left: 40px;">S (Spot) = [-1 0 2 0 -1]</p> <p style="margin-left: 40px;">W (Wave) = [-1 2 0 -2 1]</p> <p style="margin-left: 40px;">R (Ripple) = [ 1 -4 6 -4 1]</p> <p>4) Three 1-D kernels were combined via matrix multiple to generate a 5 x 5 x 5 kernel (now 3-D); all permutations of three 1-D kernels were implemented</p> |
| Gabor            | <p>The real component of the Gabor filter response in 3D at a particular (x,y,z) location was defined as:</p> $g_{\lambda,\theta,\sigma,\gamma}(x,y,z) = \exp\left(-\frac{x'^2 + y'^2 + z'^2}{2\sigma^2}\right) \cos\left(2\pi\frac{x^*}{\lambda} + \varphi\right)$ <p>where</p> $x' = x\cos\theta_{xy} - y\sin\theta_{xy}$ $y' = x\sin\theta_{xy} + y\cos\theta_{xy}$ $z^* = -x'\sin\theta_{xz} + y\cos\theta_{xz}$ $x^* = x'\cos\theta_{xz} - z\sin\theta_{xz}$                                                                                                                                                                                                                                                              |

|          |                                                                                                                                                                                                                                                                                                                                                                                                                                                                                                                                                                                                                                                                                                                                                                                                                                                                                                                                                                                                                                                                                                                                                                                                                              |
|----------|------------------------------------------------------------------------------------------------------------------------------------------------------------------------------------------------------------------------------------------------------------------------------------------------------------------------------------------------------------------------------------------------------------------------------------------------------------------------------------------------------------------------------------------------------------------------------------------------------------------------------------------------------------------------------------------------------------------------------------------------------------------------------------------------------------------------------------------------------------------------------------------------------------------------------------------------------------------------------------------------------------------------------------------------------------------------------------------------------------------------------------------------------------------------------------------------------------------------------|
|          | $\sigma = \frac{\lambda(2^B + 1)}{\pi(2^B - 1)} \sqrt{\frac{\ln(2)}{2}}$ <p>The necessary parameters are defined below along with their implemented values:</p> <ul style="list-style-type: none"> <li>• <math>\theta_{xy}</math>: orientation in x-y plane; <math>\theta_{xy} \in \{0, \pi/6, \pi/3, \pi/2, 2\pi/3, 5\pi/6\}</math> radians</li> <li>• <math>\theta_{xz}</math>: orientation in x-z plane; <math>\theta_{xz} \in \{0, \pi/4, \pi/2, 3\pi/4\}</math> radians</li> <li>• <math>B</math>: bandwidth, or half-response spatial frequency; fixed at <math>B = 1</math> (therefore <math>\sigma \approx 0.56\lambda</math>)</li> <li>• <math>\lambda</math>: wavelength of cosine factor; determined such that <math>7*0.56*\sigma</math> would equate to the window size of a m x m x m kernel; <math>\lambda \in \{0.88, 1.4142, 2.0750, 2.828, 5.6569, 11.3137\}</math></li> <li>• <math>\sigma</math>: specified based on B, <math>\lambda</math>. Isotropic filter, so <math>\sigma</math> same in all directions</li> <li>• <math>\varphi</math>: phase offset; fixed at <math>\varphi = 0</math> in all directions</li> </ul>                                                                              |
| Haralick | <ol style="list-style-type: none"> <li>1) image quantization approach - Uniform (i.e. equal distances between original gray levels and quantized bins)</li> <li>2) number of bins - 128 (i.e. 128 gray levels)</li> <li>3) offset - 1 (i.e., search D = 1 pixels away from pixel of interest)</li> <li>4) number of directions - 4 directions (bi-directional), 3 orientations (x-y, x-z, y-z) <ul style="list-style-type: none"> <li>- horizontal: 0 or 180 degrees</li> <li>- right diagonal: 45 or 135 degrees</li> <li>- vertical: 90 or 270 degrees</li> <li>- left diagonal: 135 or 315 degrees</li> </ul> </li> <li>5) extraction method - symmetrically</li> <li>6) aggregation approach for final feature estimation <ul style="list-style-type: none"> <li>- For each pixel of interest, gray-level co-occurrence matrix (GLCM) calculations were summed among all pixels within a fixed m x m x m window centered around the pixel, to create a single symmetric co-occurrence matrix</li> <li>- Features were extracted from this symmetric co-occurrence matrix for each pixel of interest, yielding 13 GLCM feature representations for each pixel of interest (visualized as heatmaps)</li> </ul> </li> </ol> |

Table S3: Implementation details of the features extracted

### Section 3 : Gd-T1w Radiomic Risk Score

The radiomic signature was constructed using the following formula:

Gd-T1w Radiomic Risk Score = median-R5S5E5 of Necrotic core (0.242897454) + kurtosis-energy (ws=5) of Necrotic core (0.241360718) + Skewness-E5E5S5 of Enhancing region (0.156897908) + Median-R5R5R5 of Enhancing region (0.140568729) + Skewness-S5R5R5 of Edematous region (0.134099892) + Skewness-XY Orient=1.0472, XZ Orient=2.3562, Bandwidth=1, Wavelength=11.3137 of Enhancing region (0.132285255) + Skewness-R5S5L5 of Necrotic core (0.127261674) + Kurtosis-R5S5R5 of Enhancing region (0.123944592) + Median-S5S5R5 of Edematous region (0.081681921) + Kurtosis-XY Orient=1.5708, XZ Orient=0, Bandwidth=1, Wavelength=1.4142 of Enhancing region (0.064584818) + Skewness-R5L5L5 (0.059900374) of Necrotic core + Kurtosis-XY Orient=1.5708, XZ

Orient=1.5708, Bandwidth=1, Wavelength=5.6569 (0.0522149) of Necrotic core + Sphericity of Edematous region (0.045438219) + Median R5R5L5 of Enhancing region (0.030598447) + Kurtosis-XY Orient=1.5708, XZ Orient=1.5708, Bandwidth=1, Wavelength=5.6569 of Edematous Region (0.020506011) + Skewness-R5L5S5 of Edematous region (0.01850727) + Std-XY Orient=1.0472, XZ Orient=1.5708, Bandwidth=1, Wavelength=11.3137 of Necrotic core (0.001913863) + Skewness-E5R5S5 of Enhancing region (-0.028723416) + Median-E5R5E5 of Necrotic core (-0.038645031) + Convexity of Edematous region (-0.044854456) + Median-R5L5E5 of Enhancing region (-0.049591168) + Elongation of Edematous region (-0.09991949) + Median-R5L5E5 of Enhancing region (-0.136694365) + Median-L5E5L5 of Edematous region (-0.148396663) + Kurtosis-XY Orient=1.5708, XZ Orient=2.3562, Bandwidth=1, Wavelength=5.6569 of Necrotic core (-0.169581107)

#### Section 4 : Clinical characteristics of Gd-T1w radiomic risk score groups

| Clinical characteristics of Gd-T1w radiomic risk score groups |              |                 |           |           |             |           |          |
|---------------------------------------------------------------|--------------|-----------------|-----------|-----------|-------------|-----------|----------|
| Clinical Variable                                             |              | Training Cohort |           | p-value   | Test Cohort |           | p-value  |
|                                                               |              | Low Risk        | High Risk |           | Low Risk    | High Risk |          |
| Mean Progression Free Survival (in days)                      |              | 409.8           | 152.8     | <0.0001 * | 463.8       | 242.3     | 0.0073 * |
| Age (in years)                                                |              | 55.8            | 60.2      | 0.0837    | 60.3        | 56.9      | 0.1858   |
| Gender                                                        | Female       | 25              | 22        | 0.5652    | 14          | 17        | 0.6681   |
|                                                               | Male         | 44              | 39        |           | 19          | 21        |          |
| MGMT Status                                                   | Methylated   | 22              | 17        | 0.4849    | 16          | 16        | 0.3748   |
|                                                               | Unmethylated | 17              | 15        |           | 16          | 21        |          |
| IDH Status                                                    | Wild type    | 54              | 48        | 0.6062    | 23          | 33        | 0.9360   |
|                                                               | Mutated      | 3               | 3         |           | 5           | 3         |          |

**Table S3:** Clinical characteristics of Gd-T1w MRI radiomic risk groups. P values were computed by using Student t test for continuous variable and Fisher exact test for categorical data. Abbreviations: MGMT - O-6-Methylguanine-DNA Methyltransferase, IDH - Isocitrate dehydrogenase.

#### Section 5 : Gene Ontology (GO) Analysis

Web-based application, GOView (<http://www.webgestalt.org/GOView/>) was used to visualize and compare the 57 GO biological processes in a directed acyclic graph (DAG) to reveal relationships among these processes. GOView enabled comparison of multiple GO processes to identify the common and specific biological themes, by exploring the semantic relationships between the ‘parent’ and ‘child’ biological processes.<sup>1</sup> It was observed that most of the biological processes involved in GO pathways were implicated in cell adhesion, cell proliferation, differentiation and angiogenesis.

<sup>1</sup> Wang et al., “WebGestalt 2017.”
